# Supplementary material for: Transmembrane and coiled-coil domain family 3 (TMCC3) regulates breast cancer stem cell and AKT activation
Source: PubMed Central journal article supplement (PMC8062265; doi:10.1038/s41388-021-01729-1), 2021-03-19

Supplementary Figure 4

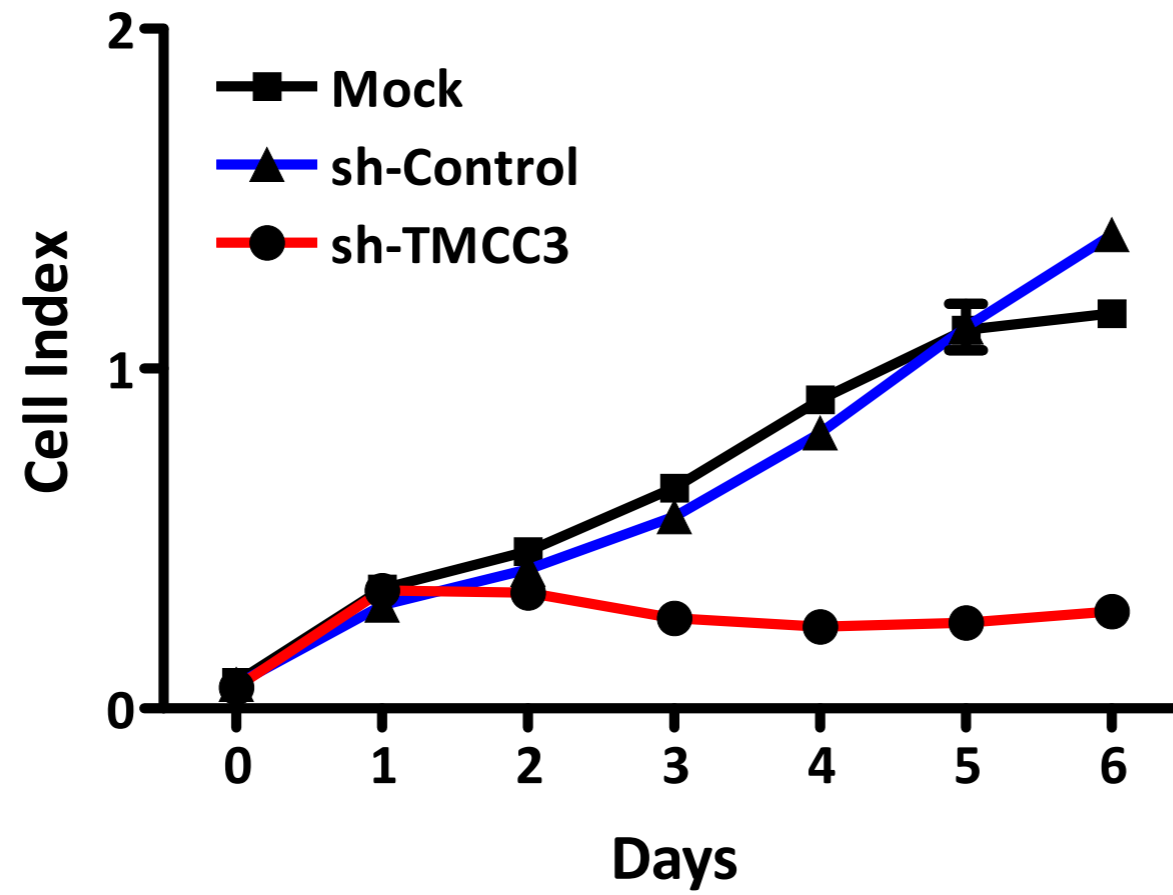

Supplement: 41388_2021_1729_MOESM5_ESM.pdf [file 41388_2021_1729_MOESM5_ESM.pdf]
